# Supplementary material for: Patient and nonradiographic tumor characteristics predicting lipid-poor angiomyolipoma in small renal masses: Introducing the BEARS index
Source: PubMed Central journal article supplement — Investig Clin Urol. 2017 Jun 27;58(4):235–40. doi: 10.4111/icu.2017.58.4.235 (PMC5494346; doi:10.4111/icu.2017.58.4.235), 2017-06-27
Supplement: icu-58-235-s001.pdf [file icu-58-235-s001.pdf]

**Supplementary Table 1.** Differences in patient characteristics between AML and RCC patients with tumors  $\leq 4$  cm

| Characteristic                       | AML (n=35)      | RCC (n=620)     | p-value |
|--------------------------------------|-----------------|-----------------|---------|
| Age at surgery (y)                   | 52.9 $\pm$ 10.7 | 57.2 $\pm$ 10.7 | 0.01    |
| Body mass index (kg/m <sup>2</sup> ) | 28.7 $\pm$ 5.3  | 30.9 $\pm$ 7.1  | 0.06    |
| Sex                                  |                 |                 | <0.001  |
| Female                               | 30 (85.7)       | 274 (44.2)      |         |
| Male                                 | 5 (14.3)        | 346 (55.8)      |         |
| Charlson comorbidity index           |                 |                 | 0.11    |
| 0                                    | 24 (68.6)       | 276 (50.7)      |         |
| 1                                    | 7 (20.0)        | 112 (20.6)      |         |
| 2                                    | 3 (8.6)         | 79 (14.5)       |         |
| $\geq 3$                             | 1 (2.9)         | 77 (14.2)       |         |
| History of diabetes                  |                 |                 | 0.54    |
| No                                   | 32 (91.4)       | 423 (77.8)      |         |
| Yes                                  | 3 (8.6)         | 121 (22.2)      |         |
| History of hypertension              |                 |                 | 0.02    |
| No                                   | 21 (60.0)       | 214 (39.3)      |         |
| Yes                                  | 14 (40.0)       | 330 (60.7)      |         |
| Nephrometry score                    | 6.3 $\pm$ 2.0   | 7.3 $\pm$ 1.7   | 0.003   |
| Radiographic tumor size (cm)         | 1.8 $\pm$ 0.7   | 2.5 $\pm$ 0.8   | <0.001  |
| Tumor polarity                       |                 |                 | 0.38    |
| Entirely above/below                 | 13 (46.4)       | 145 (33.6)      |         |
| Crosses polar lines                  | 7 (25.0)        | 139 (32.3)      |         |
| >50% over polar lines                | 8 (28.7)        | 147 (34.1)      |         |
| Missing data                         | 7               | 189             |         |
| Nearness to collecting system        |                 |                 | 0.02    |
| $\geq 7$ mm                          | 13 (46.4)       | 98 (22.7)       |         |
| 4–7 mm                               | 5 (17.9)        | 83 (19.3)       |         |
| $\leq 4$ mm                          | 10 (35.7)       | 250 (58.0)      |         |
| Missing data                         | 7               | 189             |         |
| Exophyticity                         |                 |                 | 0.001   |
| $\geq 50\%$                          | 16 (57.1)       | 112 (26.0)      |         |
| <50%                                 | 8 (28.6)        | 246 (57.1)      |         |
| Endophytic                           | 4 (14.3)        | 73 (16.9)       |         |
| Missing data                         | 7               | 189             |         |
| Anterior/posterior location          |                 |                 | 0.22    |
| Anterior                             | 13 (40.0)       | 158 (32.6)      |         |
| Posterior                            | 14 (45.7)       | 185 (38.1)      |         |
| Neither                              | 5 (14.3)        | 142 (29.3)      |         |
| Missing                              | 1               | 135             |         |
| Tumor laterality                     |                 |                 | 0.59    |
| Left                                 | 18 (51.4)       | 290 (46.8)      |         |
| Right                                | 17 (48.6)       | 330 (53.2)      |         |
| Preoperative creatinine (mg/dL)      | 0.76 $\pm$ 0.18 | 0.93 $\pm$ 0.35 | <0.001  |
| Preoperative hemoglobin (g/dL)       | 13.4 $\pm$ 1.5  | 14.0 $\pm$ 1.5  | 0.04    |

Values are presented as number (%) or mean $\pm$ standard deviation.  
 AML, angiomyolipoma; RCC, renal cell carcinoma.
