# Supplementary material for: Patient and nonradiographic tumor characteristics predicting lipid-poor angiomyolipoma in small renal masses: Introducing the BEARS index
Source: PubMed Central journal article supplement — Investig Clin Urol. 2017 Jun 27;58(4):235–40. doi: 10.4111/icu.2017.58.4.235 (PMC5494346; doi:10.4111/icu.2017.58.4.235), 2017-06-27
Supplement: icu-58-235-s002.pdf [file icu-58-235-s002.pdf]

**Supplementary Table 2.** Probability estimates for lipid-poor angiomyolipoma by BEARS index values

| BEARS index | Raw counts |     | Probability estimate (range) |
|-------------|------------|-----|------------------------------|
|             | RCC        | AML |                              |
| 0           | 152        | 0   | 0.3 (0.1–1.0)                |
| 1           | 109        | 1   | 0.9 (0.4–2.1)                |
| 2           | 172        | 6   | 2.4 (1.3–4.3)                |
| 3           | 118        | 8   | 6.3 (4.3–9.1)                |
| 4           | 41         | 4   | 15.3 (11.0–20.9)             |
| 5           | 28         | 16  | 32.8 (22.2–45.7)             |

BEARS, BEnign Angiomyolipoma Renal Susceptibility; RCC, renal cell carcinoma; AML, angiomyolipoma.
